# Supplementary material for: Stress-inducible NHEJ in bacteria: function in DNA repair and acquisition of heterologous DNA
Source: PubMed Central journal article supplement — Nucleic Acids Res. 2018 Dec 4;47(3):1335–49. doi: 10.1093/nar/gky1212 (PMC6379672; doi:10.1093/nar/gky1212), 2018-12-04
Supplement: gky1212_supplemental_files.pdf [file gky1212_supplemental_files.pdf]

## SUPPLEMENTARY MATERIAL AND METHODS

### Gene deletions and mutant complementations

Gene deletions were performed using pJQ200mp19 derivatives containing ~350 to 450 bp regions flanking the gene(s) to be deleted: *ku1* (SMa0426), *ku2* (SMb20686), *ku3 ku4* (SMb21406-SMb21407), *ligD1* (SMa0414-SMa0417), *ligD2* (SMb20685), *ligD3* (SMb21044), *ligD4* (SMc03959). Open reading frames-flanking DNA fragments were amplified by PCR using *S. meliloti* GMI11495 genomic DNA as template and the oligonucleotides listed in Table S2 as primers, and individually cloned into pGEM-T. These regions were then subsequently juxtaposed as *SalI*-*Bam*HI and *Bam*HI-*SacI* fragments into *SalI*-*SacI*-digested pJQ200mp19. Plasmids were introduced in *S. meliloti* by electrotransformation as described (1). Single-crossover genomic integration of each pJQ200mp19 derivative was generated by selecting for Gm resistance. The resulting strains were then propagated in the absence of antibiotic, and cells having lost the plasmid by a second recombination event were selected by plating on LBMC supplemented with 5% sucrose (Suc). Suc<sup>R</sup> Gm<sup>S</sup> colonies were screened by PCR analysis using primers indicated in Table S2. Multiple mutants were constructed by the introduction of successive deletions as indicated in Table S3.

For complementations, *ligD2* and *ku2* genes, including their own promoters, were amplified by PCR using *S. meliloti* GMI11495 genomic DNA as template and OCB1444-OCB1445 and OCB1502-OCB1503 as primers, respectively, and cloned into pJET1.2. *ligD2* was extracted from pJET1.2 by *Bgl*III digestion and subcloned into the pJQ200mp19-derivative pLS272 (see construction details below) in *Bam*HI. *ku2* was extracted from pJET1.2 by *Xho*I-*Xba*I digestions and subcloned into pLS272 in *Nsi*I-*Avr*II. Before *Xba*I or *Avr*II digestions, *Xho*I and *Nsi*I DNA ends were blunted using the T4 DNA polymerase. *ku2* and *ligD2* genes were introduced into the *S. meliloti* chromosome (*rhaS* gene) by a double recombination event as described above for gene deletions.

For *ku3* and *ku3-ku4* operon complementation, genes including their own promoters were amplified by PCR using *S. meliloti* GMI11495 genomic DNA as template and OCB1426-OCB1427 and OCB1426-OCB1428 as primers, respectively. For *ku4* complementation, PCR amplification was carried out with OCB1426-OCB1428 using CBT1811 (*S. meliloti* GMI11495  $\Delta ku3$ ) genomic DNA as template to produce a fragment containing *ku4* preceded by the promoter of the *ku3-ku4* operon. These fragments were cloned into pGEM-T before being subcloned into the pJQ200mp19 derivative pLS282-3 (see construction details below)

as *XbaI-BamHI* (*ku3* and *ku3-ku4* complementation) or *XbaI-NdeI* (*ku4* complementation) fragments.

### ***I-SceI* expression and restriction site integration**

For *I-SceI* expression, a plasmid derived from pQF was used to clone the *I-SceI* coding sequence under the control of a cumate inducible promoter. pQF was first modified by inserting in between the *AseI-SpeI* restriction sites a dsDNA adapter obtained by annealing oligonucleotides OCB1481 and OCB1482, giving pLS256-1. Using OCB1483 and OCB1484, a second adapter was then cloned into *BamHI-MfeI*-cut pLS256-1 giving pLS257-1. Then, an *NdeI-PstI* fragment containing the *I-SceI* coding sequence was purified from pDAI-*SceI* and subcloned into *AseI-NsiI*-cut pLS257-1, giving pLS273-25. Among the first *S. meliloti* clones carrying the *I-SceI* expressing plasmid but still having an intact *I-SceI* restriction site on the chromosome, several were streaked out on TY medium containing tetracycline and supplemented or not by 100  $\mu$ M cumate. All tested clones but one (containing pLS273-25\*) were able to grow on cumate-containing medium suggesting that this latter was still able to cleave *I-SceI* restriction site on the chromosome when induced with cumate. The plasmid from this cumate sensitive clone was extracted and sequenced, revealing a stop codon (TAC>TAG), leading to the synthesis of a truncated protein lacking the last 31 amino acids, presumably less active than WT form of I-SceI meganuclease.

To introduce an *I-SceI* restriction site into the *S. meliloti* chromosome, the first half of the *rhaS* coding sequence was PCR amplified using OCB1531 and OCB1532, generating a fragment flanked by *SacI* and *BamHI* restriction sites. The second half of *rhaS* was PCR amplified using OCB1533 and OCB1534 giving a fragment flanked by *BamHI* and *SalI* restriction sites and bearing an *I-SceI* restriction site in the vicinity of *BamHI*. These two fragments were individually cloned into pGEM-T before being juxtaposed into *SacI-SalI*-cut pJQ200mp19 as *SacI-BamHI* and *BamHI-SalI* fragments, giving pLS272-1. Addition of a second *I-SceI* restriction site and a multiple cloning site between the two halves of *rhaS* was performed by inserting an adapter into *BamHI*-cut pLS272-1. This adapter was obtained by annealing OCB1581 and OCB1582 and the orientation of adapter insertion was checked by PCR followed by *I-SceI* restriction. pLS282-3 contains an inverted orientation of the adapter, leading to two successive *I-SceI* sites followed by the multiple cloning site (*XhoI*, *XbaI*, *SmaI*, *XmaI*, *SpeI*, *MfeI*, *NdeI*).

**Plasmid constructions for  $\beta$ -galactosidase assays.** Plasmids were constructed from the *ku* and *ligD* upstream regions cloned into pGEM-T for gene deletions, and containing the gene promoters. Gene promoters were extracted from pGEM-T derivatives with *Bam*HI/*Nsi*I digestions and subcloned into pCZ962 in *Xba*I/*Nsi*I sites. Before the *Nsi*I digestion, *Bam*HI and *Xba*I DNA ends were blunted using the T4 DNA polymerase.

### **Plasmid-based NHEJ assay**

To measure NHEJ efficiency, several pBBR1MCS-5 derivatives were constructed. The 5' region of *lacZ* was amplified by PCR using pCZ962 as template and OCB1317-OCB1318 as primers, and cloned into pGEM-T. The *Sac*I/*Age*I *lacZ* 5' region was subcloned into pBBR1MCS-5 giving pDP59. The *lacZ* 3' region was extracted from pCZ962 with *Aat*II and *Asc*I digestions and subcloned into pDP59 in *Aat*II/*Mlu*I sites giving pDP62. The *sacB* gene was amplified by PCR using pJQ200mp19 as template and OCB1319-OCB1320 as primers, cloned into pGEM-T and subcloned in *Bam*HI, *Sma*I or *Pst*I in pDP62 giving respectively pDP63, pDP64 and pDP65.

The Tet<sup>R</sup> pBBR1MCS-5 derivative used for normalization of transformation efficiencies was constructed as follows. The *tetA tetR* region was amplified by PCR using pCZ962 as template and OCB1414-OCB1415 as primers, cloned into pGEM-T, and subcloned into pBBR1MCS-5 as a *Nco*I/*Bgl*II fragment (*Nco*I/*Bgl*II digestion removes the Gm<sup>R</sup> gene from pBBR1MCS-5).

### **DNA integration assays**

The DNA fragment conferring spectinomycin resistance was amplified from pHP45- $\Omega$  using OCB1535 and OCB1543, each one carrying a *Bst*XI restriction site contiguous to an external *Bam*HI restriction site. For each primer, the *Bst*XI restriction site was designed to generate a 3' protruding end compatible with the 3' protruding ends generated by *I-Sce*I. The PCR fragment was cloned into pGEM-T, and then subcloned into *Bam*HI-cut pBBR1MCS-5 giving pLS278-9.

## SUPPLEMENTARY TABLES

**Table S1:** Strains and plasmids used in this study.

| Strain or plasmid             | Description                                                                                                                                     | Reference or source |
|-------------------------------|-------------------------------------------------------------------------------------------------------------------------------------------------|---------------------|
| <b>Strains</b>                |                                                                                                                                                 |                     |
| <i>Sinorhizobium meliloti</i> |                                                                                                                                                 |                     |
| GMI11495                      | wild-type strain (Sm <sup>R</sup> ), Rm2011 background                                                                                          | (2, 3)              |
| CBT1809                       | GMI11495 $\Delta ku1$ (SMa0426)                                                                                                                 | This work           |
| CBT1810                       | GMI11495 $\Delta ku2$ (SMb20686)                                                                                                                | This work           |
| CBT1823                       | GMI11495 $\Delta ku34$ (SMb21406-21407)                                                                                                         | This work           |
| CBT1892                       | GMI11495 $\Delta ku12$                                                                                                                          | This work           |
| CBT1893                       | GMI11495 $\Delta ku234$                                                                                                                         | This work           |
| CBT1960                       | GMI11495 $\Delta ku123$                                                                                                                         | This work           |
| CBT1961                       | GMI11495 $\Delta ku124$                                                                                                                         | This work           |
| CBT1899                       | GMI11495 $\Delta ku1234$                                                                                                                        | (4)                 |
| CBT1938                       | GMI11495 $\Delta recA$                                                                                                                          | (4)                 |
| CBT1943                       | GMI11495 $\Delta recA \Delta ku1234$                                                                                                            | (4)                 |
| CBT2183                       | GMI11495 $\Delta ku2 rhaS::ku2$                                                                                                                 | This work           |
| CBT2381                       | GMI11495 $\Delta ku123 rhaS::ku3$                                                                                                               | This work           |
| CBT2383                       | GMI11495 $\Delta ku124 rhaS::ku4$                                                                                                               | This work           |
| CBT2385                       | GMI11495 $\Delta ku1234 rhaS::ku34$                                                                                                             | This work           |
| CBT2382                       | GMI11495 $\Delta ku1234 rhaS::ku3$                                                                                                              | This work           |
| CBT2384                       | GMI11495 $\Delta ku1234 rhaS::ku4$                                                                                                              | This work           |
| CBT1813                       | GMI11495 $\Delta ligD1$ (SMa0414-0417)                                                                                                          | This work           |
| CBT2162                       | GMI11495 $\Delta ligD2$ (SMb20685)                                                                                                              | This work           |
| CBT1811                       | GMI11495 $\Delta ku3$ (SMb21406)                                                                                                                | This work           |
| CBT1815                       | GMI11495 $\Delta ligD3$ (SMb21044)                                                                                                              | This work           |
| CBT1816                       | GMI11495 $\Delta ligD4$ (SMc03959)                                                                                                              | This work           |
| CBT2158                       | GMI11495 $\Delta ligD134$                                                                                                                       | This work           |
| CBT2180                       | GMI11495 $\Delta ligD234$                                                                                                                       | This work           |
| CBT2164                       | GMI11495 $\Delta ligD1234$                                                                                                                      | This work           |
| CBT2172                       | GMI11495 $\Delta ligD2 rhaS::ligD2$                                                                                                             | This work           |
| CBT2000                       | GMI11495 $\Delta ku12 \Delta ligD2$                                                                                                             | This work           |
| CBT1962                       | GMI11495 $\Delta ku12 \Delta ligD4$                                                                                                             | This work           |
| CBT2005                       | GMI11495 $\Delta ku12 \Delta ligD24$                                                                                                            | This work           |
| CBT2082                       | GMI11495 $\Delta ku12 \Delta ligD234$                                                                                                           | This work           |
| CBT2120                       | GMI11495 $\Delta ku12 \Delta ligD1234$                                                                                                          | This work           |
| CBT2173                       | GMI11495 $rhaS::I-SceI$                                                                                                                         | This work           |
| CBT2175                       | GMI11495 $\Delta ku2 rhaS::I-SceI$                                                                                                              | This work           |
| CBT2177                       | GMI11495 $\Delta ku1234 rhaS::I-SceI$                                                                                                           | This work           |
| CBT2496                       | GMI11495 $\Delta ligD1234 rhaS::I-SceI$                                                                                                         | This work           |
| CBT907                        | GMI11495 $rpoE2::hph$                                                                                                                           | (3)                 |
| CBT2003                       | GMI11495 $\Delta ku12 rpoE2::hph$                                                                                                               | This work           |
| <i>Escherichia coli</i>       |                                                                                                                                                 |                     |
| DH5 $\alpha$                  | F <sup>+</sup> $\Phi 80lacZ\Delta M15 \Delta(lacZYA-argF)$ U169 $recA1 endA1$ $hsdR17(r_k^-, m_k^+)$ $phoA supE44 thi-1 gyrA96 relA1 \lambda^-$ | Invitrogen          |

## Plasmids

|                   |                                                                              |                  |
|-------------------|------------------------------------------------------------------------------|------------------|
| pGEM-T            | Cloning vector (Amp <sup>R</sup> )                                           | Promega          |
| pJET1.2           | Cloning vector (Amp <sup>R</sup> )                                           | ThermoScientific |
| pJQ200mp19        | Gene replacement vector (Gm <sup>R</sup> )                                   | (5)              |
| pBBR1MCS-5        | Expression vector (Gm <sup>R</sup> )                                         | (6)              |
| pHP45-Ω           | vector (Spec <sup>R</sup> )                                                  | (7)              |
| pCZ962            | Cloning vector (Tet <sup>R</sup> Amp <sup>R</sup> )                          | (8)              |
| pDAI- <i>SceI</i> | <i>I-SceI</i> constitutive expression vector (Tet <sup>R</sup> )             | (9)              |
| pQF               | Cumate inducible expression vector (Tet <sup>R</sup> )                       | (10)             |
| pDP39             | pJQ200mp19 derivative for <i>ku1</i> deletion                                | this work        |
| pDP40             | pJQ200mp19 derivative for <i>ku2</i> deletion                                | this work        |
| pDP41             | pJQ200mp19 derivative for <i>ku3</i> deletion                                | this work        |
| pDP42             | pJQ200mp19 derivative for <i>ku4</i> deletion                                | this work        |
| pDP56             | pJQ200mp19 derivative for <i>ku34</i> deletion                               | this work        |
| pDP43             | pJQ200mp19 derivative for <i>ligD1</i> deletion                              | this work        |
| pDP113            | pJQ200mp19 derivative for <i>ligD2</i> deletion                              | this work        |
| pDP45             | pJQ200mp19 derivative for <i>ligD3</i> deletion                              | this work        |
| pDP46             | pJQ200mp19 derivative for <i>ligD4</i> deletion                              | this work        |
| pDP55             | pJQ200mp19 derivative for <i>ligD2ku2</i> deletion                           | this work        |
| pDP52             | pJQ200mp19 derivative for <i>recA</i> deletion                               | this work        |
| pLS272-1          | pJQ200mp19 derivative for <i>I-SceI</i> insertion at the <i>rhaS</i> locus   | this work        |
| pLS282-3          | pJQ200mp19 derivative for 2 <i>I-SceI</i> insertion at the <i>rhaS</i> locus | this work        |
| pDP115            | pLS272-1 derivative for <i>ligD2</i> insertion at the <i>rhaS</i> locus      | this work        |
| pDP116            | pLS272-1 derivative for <i>ku2</i> insertion at the <i>rhaS</i> locus        | this work        |
| pLS289-9          | pLS282-3 derivative for <i>ku3</i> insertion at the <i>rhaS</i> locus        | this work        |
| pLS290-13         | pLS282-3 derivative for <i>ku4</i> insertion at the <i>rhaS</i> locus        | this work        |
| pLS294-8          | pLS282-3 derivative for <i>ku34</i> insertion at the <i>rhaS</i> locus       | this work        |
| pDP66             | pCZ962 derivative for measure of <i>ku34</i> promoter activity               | this work        |
| pDP67             | pCZ962 derivative for measure of <i>ligD4</i> promoter activity              | this work        |
| pDP68             | pCZ962 derivative for measure of <i>ku1</i> promoter activity                | this work        |
| pDP69             | pCZ962 derivative for measure of <i>ku2</i> promoter activity                | this work        |
| pDP70             | pCZ962 derivative for measure of <i>ligD2</i> promoter activity              | this work        |
| pDP92             | pCZ962 derivative for measure of <i>ligD1</i> promoter activity              | this work        |
| pDP93             | pCZ962 derivative for measure of <i>ligD3</i> promoter activity              | this work        |
| pDP58             | pGEM-T derivative with <i>sacB</i>                                           | this work        |
| pDP62             | pBBR1MCS-5 with complete <i>lacZ</i> gene                                    | this work        |
| pDP63             | pDP62 with <i>sacB</i> inside <i>lacZ</i> in <i>BamHI</i> site               | this work        |
| pDP64             | pDP62 with <i>sacB</i> inside <i>lacZ</i> in <i>SmaI</i> site                | this work        |
| pDP65             | pDP62 with <i>sacB</i> inside <i>lacZ</i> in <i>PstI</i> site                | this work        |
| pDP90             | pBBR1MCS-5 derivative (Tet <sup>R</sup> )                                    | this work        |
| pLS257-1          | pQF derivative without 3' and 5' Flag                                        | this work        |
| pLS273-25         | pLS257-1 derivative for <i>I-SceI</i> constitutive expression                | this work        |
| pLS273-25*        | pLS273-25 derivative for <i>I-SceI</i> cumate inducible expression           | this work        |
| pLS278-9          | pBBR1MCS-5 derivative with Spec <sup>R</sup> cassette                        | this work        |

---

**Table S2:** Oligonucleotides used in this study.

| Name                                                                    | Sequence (5'→3') <sup>a</sup>      | Target                        |
|-------------------------------------------------------------------------|------------------------------------|-------------------------------|
| Amplification of upstream and downstream regions of genes for deletions |                                    |                               |
| OCB1284                                                                 | <b>GGATCCGGCCATGGCGACCTCCG</b>     | fw <i>ku1</i> upstream        |
| OCB1285                                                                 | <b>GAGCTCCGACGGCCTTCTGCTTGG</b>    | rev <i>ku1</i> upstream       |
| OCB1286                                                                 | <b>GTCGACGAAATCGGACCGTCCTTCC</b>   | fw <i>ku1</i> downstream      |
| OCB1287                                                                 | <b>GGATCCGCCTTGC GGAAATCAGTCG</b>  | rev <i>ku1</i> downstream     |
| OCB1272                                                                 | <b>GTCGACTAAAGACATCTGGCGGCAGG</b>  | fw <i>ku2</i> upstream        |
| OCB1273                                                                 | <b>GGATCCTGCCATGGTTTTCTCCCTACG</b> | rev <i>ku2</i> upstream       |
| OCB1274                                                                 | <b>GGATCCGCCAAGAAGAAAGCCTGATGG</b> | fw <i>ku2</i> downstream      |
| OCB1275                                                                 | <b>GAGCTCGAGGCGACGTTTCCGGAGC</b>   | rev <i>ku2</i> downstream     |
| OCB1260                                                                 | <b>GTCGACACGCGGTCAAGGCCACC</b>     | fw <i>ku3</i> upstream        |
| OCB1261                                                                 | <b>GGATCCTGCCATGGCTAACTCCCTG</b>   | rev <i>ku3</i> upstream       |
| OCB1262                                                                 | <b>GGATCCGCCAGCTAGGAAGGTGAACG</b>  | fw <i>ku3</i> downstream      |
| OCB1263                                                                 | <b>GAGCTCCGCACGGTTCTAGCATCACG</b>  | rev <i>ku3</i> downstream     |
| OCB1264                                                                 | <b>GTCGACAAGTCGCCGCAATCGCCC</b>    | fw <i>ku4</i> upstream        |
| OCB1265                                                                 | <b>GGATCCC GCCATCGTTCACCTTCC</b>   | rev <i>ku4</i> upstream       |
| OCB1266                                                                 | <b>GGATCCAAGTCTTAAGGAGGGATGGC</b>  | fw <i>ku4</i> downstream      |
| OCB1267                                                                 | <b>GAGCTCCGTTGTGGTCCAGTACTGC</b>   | rev <i>ku4</i> downstream     |
| OCB1292                                                                 | <b>GAGCTCCTAGAACGAGGAACCCGG</b>    | fw <i>ligD1</i> upstream      |
| OCB1293                                                                 | <b>GGATCCCTGAGCCTCGCCGCTTGG</b>    | rev <i>ligD1</i> upstream     |
| OCB1294                                                                 | <b>GGATCCGCTGCGTGAGCACCAGG</b>     | fw <i>ligD1</i> downstream    |
| OCB1295                                                                 | <b>GTCGACGGCTCACTGCGCTCGGC</b>     | rev <i>ligD1</i> downstream   |
| OCB1268                                                                 | <b>GAGCTCCTCGCCCATGCCGGAAACG</b>   | fw <i>ligD2</i> upstream      |
| OCB1269                                                                 | <b>GGATCCC GTCGCCATGCGCCCAAGC</b>  | rev <i>ligD2</i> upstream     |
| OCB1525                                                                 | <b>GGATCCC GCAAGCTGCTCGGCAAGC</b>  | fw <i>ligD2</i> downstream    |
| OCB1526                                                                 | <b>GTCGACGTTTCCGCCTGCATCCCG</b>    | rev <i>ligD2</i> downstream   |
| OCB1280                                                                 | <b>GGATCCGTCCACCCATCCAACCC</b>     | fw <i>ligD3</i> upstream      |
| OCB1281                                                                 | <b>GAGCTCCAAAGACGGCAAGCTCACCC</b>  | rev <i>ligD3</i> upstream     |
| OCB1282                                                                 | <b>GTCGACGTGCGGAAACGCATGGAGG</b>   | fw <i>ligD3</i> downstream    |
| OCB1283                                                                 | <b>GGATCCAGCTAATCATCTGCCTGGG</b>   | rev <i>ligD3</i> downstream   |
| OCB1276                                                                 | <b>CTCTTGTCGACGACGATAGC</b>        | fw <i>ligD4</i> upstream      |
| OCB1277                                                                 | <b>GGATCCGGCCATGGATCGTCAGCC</b>    | rev <i>ligD4</i> upstream     |
| OCB1278                                                                 | <b>GGATCCGTGCGAATGAGCCGGCCG</b>    | fw <i>ligD4</i> downstream    |
| OCB1279                                                                 | <b>GAGCTCATCCTCCCGGAGAATGCC</b>    | rev <i>ligD4</i> downstream   |
| OCB1302                                                                 | <b>GAGCTCCCGAGCATCTCGAAGAAGG</b>   | fw <i>recA</i> upstream       |
| OCB1303                                                                 | <b>GGATCCGATATGTAATCGGGAACAACC</b> | rev <i>recA</i> upstream      |
| OCB1304                                                                 | <b>GGATCCC GATTTGTCTCTACGAGC</b>   | fw <i>recA</i> downstream     |
| OCB1305                                                                 | <b>GTCGACGCTTCTCGAACCAAGCGC</b>    | rev <i>recA</i> downstream    |
| Screening of genomic deletions or insertions                            |                                    |                               |
| OCB1321                                                                 | <b>GATGCTTGGCGATGATCCC</b>         | fw screening of $\Delta ku1$  |
| OCB1322                                                                 | <b>GCCACTGGCATGACGTCG</b>          | rev screening of $\Delta ku1$ |
| OCB1323                                                                 | <b>CGCAAGCTGCTCGGCAAGC</b>         | fw screening of $\Delta ku2$  |
| OCB1324                                                                 | <b>GAGCGAAGAGATCTTCGAGC</b>        | rev screening of $\Delta ku2$ |

|         |                       |                                               |
|---------|-----------------------|-----------------------------------------------|
| OCB1325 | TTCTGACGAGCGTGATCGC   | fw screening of $\Delta ku34$                 |
| OCB1328 | CTGCGGTCTGCTCCATGC    | rev screening of $\Delta ku34$                |
| OCB1329 | ACTGCGGAATATCAGTCACC  | fw screening of $\Delta ligD1$                |
| OCB1330 | GCCTCGTCTTGTTGCGTCC   | rev screening of $\Delta ligD1$               |
| OCB1331 | GTGCGCCGACGCGATTCC    | fw screening of $\Delta ligD2$                |
| OCB1332 | GCACCTCGTTGGGATTGCG   | rev screening of $\Delta ligD2$               |
| OCB1333 | CTGGAATGCGCTCTTCGC    | fw screening of $\Delta ligD3$                |
| OCB1334 | CGGATGAAGTTGGCGATGC   | rev screening of $\Delta ligD3$               |
| OCB1335 | CCATTCCGCTCGTCTGCC    | fw screening of $\Delta ligD4$                |
| OCB1336 | GCTCGGGAAGAGGACAGG    | rev screening of $\Delta ligD4$               |
| OCB1339 | TGACGAGCAGACGCTTGGC   | fw screening of $\Delta recA$                 |
| OCB1340 | CACACCGGCAGCTTCCGC    | rev screening of $\Delta recA$                |
| OCB1539 | TCGGGCAGGAAGACGCAGC   | fw screening of insertions in <i>rhaS</i>     |
| OCB1547 | CAAACACCCCAGCACGATCAG | rev screening of insertions in <i>rhaS</i>    |
| OCB1579 | ATAGACGGTGGCGACCAC    | fw sequencing of insertions in <i>I-SceI</i>  |
| OCB1580 | GGCAACATGATCATCAAGC   | rev sequencing of insertions in <i>I-SceI</i> |

Amplification of genes for complementations

|         |                                    |                                                   |
|---------|------------------------------------|---------------------------------------------------|
| OCB1502 | <b>AAGCTT</b> ACTCGCCTGATATTGCAGCC | fw <i>ku2</i> for <i>ku2</i> complementation      |
| OCB1503 | <b>TCTAGA</b> ATGTCCGACCGGCAAGCG   | rev <i>ku2</i> for <i>ku2</i> complementation     |
| OCB1444 | <b>TCTAGAC</b> GCAAGGCTTATGAGAAGG  | fw <i>ligD2</i> for <i>ligD2</i> complementation  |
| OCB1445 | <b>GGATCC</b> GGCACTACGATCACATCTGC | rev <i>ligD2</i> for <i>ligD2</i> complementation |
| OCB1426 | <b>TCTAGA</b> ACGCGGTCAAGGCCACC    | fw <i>ku3</i> for <i>ku3/ku4</i> complementations |
| OCB1427 | <b>GGATCC</b> CGCCATCGTTCACCTTCC   | rev <i>ku3</i> for <i>ku3</i> complementation     |
| OCB1428 | <b>GGATCC</b> GCTTCCGCTATCGACCACC  | rev <i>ku4</i> for <i>ku4</i> complementation     |

Constructions for transformation assays

|         |                                                                    |                                                                         |
|---------|--------------------------------------------------------------------|-------------------------------------------------------------------------|
| OCB1414 | <b>CCATGGT</b> GAGATAGATCCGTCAATTCC                                | fw <i>tetA tetR</i> (pCZ962)                                            |
| OCB1415 | <b>AGATCTG</b> CTCTGCTGTAGTGAGTGG                                  | rev <i>tetA tetR</i> (pCZ962)                                           |
| OCB1319 | <b>CTGCAGGATCCC</b> GGGGATCGACTCTAGC<br>TAGAGG                     | fw <i>sacB</i> (pJQ200mp19)                                             |
| OCB1320 | <b>CTGCAGGATCCC</b> GGGGATATCGACCCA<br>AGTACCG                     | rev <i>sacB</i> (pJQ200mp19)                                            |
| OCB1317 | <b>GAGCTCC</b> GTCGTTTTTACAACGTCGTG                                | fw <i>lacZ</i> N-ter (pCZ962)                                           |
| OCB1318 | <b>ACCGGTAC</b> GCGTGAGTGGCAACATGGAA<br>ATCG                       | rev <i>lacZ</i> N-ter (pCZ962)                                          |
| OCB1531 | <b>GAGCTCA</b> AGTCCTGAAATCATTGATGG                                | fw 5' <i>rhaS</i> ( <i>I-SceI</i> addition)                             |
| OCB1532 | <b>GGATCCCC</b> ACGTATTCTGATTGGTCC                                 | rev 5' <i>rhaS</i> ( <i>I-SceI</i> addition)                            |
| OCB1533 | <b>GGATCCTAGGGATAACAGGGTAAT</b> GGA<br>TCGCCGAAATGAAGAAGG          | fw 3' <i>rhaS</i> ( <i>I-SceI</i> addition)                             |
| OCB1534 | <b>GTCGAC</b> AGAAGATCTTCGCGAATTCC                                 | rev 3' <i>rhaS</i> ( <i>I-SceI</i> addition)                            |
| OCB1535 | <b>GGATCCCCAAATAATTGG</b> AGCTTAGTAA<br>AGCCCTCGC                  | fw <i>spec<sup>R</sup> BstXI</i> DNA end (pHP45- $\Omega$ )             |
| OCB1543 | <b>GGATCCCCAATTATTTGG</b> GCCTGTTCCG<br>TTCGTAAGC                  | rev <i>spec<sup>R</sup> BstXI</i> DNA end (pHP45- $\Omega$ )            |
| OCB1581 | GATCCATATGCAATTGACTAGTCCCGGGT<br>CTAGACTCGAGTAGGGATAACAGGGTAA<br>T | fw linker mcs + <i>I-SceI</i> addition<br>(pLS272-1 <i>Bam</i> HI site) |

|                                     |                                                                |                                                                          |
|-------------------------------------|----------------------------------------------------------------|--------------------------------------------------------------------------|
| OCB1582                             | GATCATTACCCTGTTATCCCTACTCGAGT<br>CTAGACCCGGGACTAGTCAATTGCATATG | rev linker mcs + <i>I-SceI</i> addition<br>(pLS272-1 <i>Bam</i> HI site) |
| Screening of NHEJ repair infidelity |                                                                |                                                                          |
| M13 rev                             | GGAAACAGCTATGACCAT                                             | Universal primer                                                         |
| OCB1043                             | AAGGGGGATGTGCTGCAAGG                                           | pBBR1MCS-5 and derivatives<br>(upstream multiple cloning site)           |
| OCB1178                             | CGTGCCTTCATCCGTTTCC                                            | pBBR1MCS-5 and derivatives<br>(downstream multiple cloning site)         |

---

<sup>a</sup>restriction sites are indicated in bold letters. *I-SceI* and *Bst*XI sites are underlined.



**Table S3:** Multiple mutant constructions.

| Strains | Description                                           |
|---------|-------------------------------------------------------|
| CBT1809 | <i>ku1</i> deletion in GMI11495 (WT)                  |
| CBT1810 | <i>ku2</i> deletion in GMI11495 (WT)                  |
| CBT1813 | <i>ligD1</i> deletion in GMI11495 (WT)                |
| CBT1815 | <i>ligD3</i> deletion in GMI11495 (WT)                |
| CBT1816 | <i>ligD4</i> deletion in GMI11495 (WT)                |
| CBT1822 | <i>ligD2</i> and <i>ku2</i> deletion in GMI11495 (WT) |
| CBT1823 | <i>ku34</i> deletion in GMI11495 (WT)                 |
| CBT1892 | <i>ku1</i> deletion in CBT1810                        |
| CBT1893 | <i>ku34</i> deletion in CBT1810                       |
| CBT1899 | <i>ku1</i> deletion in CBT1893                        |
| CBT1938 | <i>recA</i> deletion in GMI11495                      |
| CBT1943 | <i>recA</i> deletion in CBT1899                       |
| CBT1946 | <i>ku4</i> deletion in CBT1810                        |
| CBT1957 | <i>ku3</i> deletion in CBT1810                        |
| CBT1960 | <i>ku1</i> deletion in CBT1957                        |
| CBT1961 | <i>ku1</i> deletion in CBT1946                        |
| CBT1962 | <i>ligD4</i> deletion in CBT1892                      |
| CBT1997 | <i>ku2</i> deletion in CBT907 ( <i>rpoE2::hph</i> )   |
| CBT2000 | <i>ku1</i> deletion in CBT1822                        |
| CBT2003 | <i>ku1</i> deletion in CBT1997                        |
| CBT2005 | <i>ligD4</i> deletion in CBT2000                      |
| CBT2082 | <i>ligD3</i> deletion in CBT2005                      |
| CBT2119 | <i>ligD1</i> deletion in CBT1815                      |
| CBT2120 | <i>ligD1</i> deletion in CBT2082                      |
| CBT2158 | <i>ligD4</i> deletion on CBT2119                      |
| CBT2162 | <i>ligD2</i> deletion in GMI11495 (WT)                |
| CBT2163 | <i>ligD2</i> deletion in CBT1816                      |
| CBT2164 | <i>ligD2</i> deletion in CBT2158                      |
| CBT2180 | <i>ligD3</i> deletion in CBT2163                      |

**Table S4:** One way Anova detailed analysis values.

| Figure | DNA end                    | total n values | F value | DFn | DFd | P value |
|--------|----------------------------|----------------|---------|-----|-----|---------|
| Fig.1A | 5' end ( <i>Bam</i> HI)    | 38             | 40.52   | 7   | 30  | <0.0001 |
| Fig.1A | Blunt end ( <i>Sma</i> I)* | 27             | 3.831   | 4   | 22  | 0.0165  |
| Fig.1A | 3' end ( <i>Pst</i> I)     | 43             | 8.068   | 7   | 35  | <0.0001 |
| Fig.1B | 5' end ( <i>Bam</i> HI)    | 24             | 64.42   | 4   | 19  | <0.0001 |
| Fig.1B | Blunt end ( <i>Sma</i> I)* | 19             | 1.437   | 2   | 16  | 0.2668  |
| Fig.1B | 3' end ( <i>Pst</i> I)     | 26             | 5.24    | 4   | 21  | 0.0044  |
| Fig.2A | 5' end ( <i>Bam</i> HI)    | 40             | 71.58   | 6   | 33  | <0.0001 |
| Fig.2A | Blunt end ( <i>Sma</i> I)* | 32             | 39.16   | 4   | 27  | <0.0001 |
| Fig.2A | 3' end ( <i>Pst</i> I)     | 45             | 15.59   | 6   | 38  | <0.0001 |
| Fig.2B | 5' end ( <i>Bam</i> HI)    | 67             | 110.2   | 13  | 53  | <0.0001 |
| Fig.2B | Blunt end ( <i>Sma</i> I)* | 45             | 29.07   | 8   | 36  | <0.0001 |
| Fig.2B | 3' end ( <i>Pst</i> I)     | 70             | 35.21   | 13  | 56  | <0.0001 |
| Fig.3A | 5' end ( <i>Bam</i> HI)    | 25             | 191.7   | 6   | 18  | <0.0001 |
| Fig.3A | Blunt end ( <i>Sma</i> I)* | 16             | 11.29   | 4   | 11  | 0.0007  |
| Fig.3A | 3' end ( <i>Pst</i> I)     | 25             | 50.2    | 6   | 18  | <0.0001 |
| Fig.3B | 5' end ( <i>Bam</i> HI)    | 25             | 37.55   | 5   | 19  | <0.0001 |
| Fig.3B | Blunt end ( <i>Sma</i> I)* | 18             | 39.55   | 3   | 14  | <0.0001 |
| Fig.3B | 3' end ( <i>Pst</i> I)     | 24             | 10.82   | 5   | 18  | <0.0001 |
| Fig.4A | -                          | 48             | 504.8   | 15  | 32  | <0.0001 |
| Fig.4B | -                          | 36             | 450.8   | 11  | 24  | <0.0001 |
| Fig.4C | 5' end ( <i>Bam</i> HI)    | 27             | 33.91   | 3   | 23  | <0.0001 |
| Fig.4C | Blunt end ( <i>Sma</i> I)* | n.a            | n.a     | n.a | n.a | n.a     |
| Fig.5A | -                          | 59             | 17.98   | 6   | 52  | <0.0001 |
| Fig.5B | -                          | 24             | 48.98   | 7   | 16  | <0.0001 |

\* for blunt end repair, strains unable to give colony were excluded from the test (treshold values reported on related figures instead of plot data).

**Table S5:** Fidelity of repair events.

| Condition & genotype                          | Fidelity (%) <sup>a</sup> |              |              | Total number of colonies |              |              |
|-----------------------------------------------|---------------------------|--------------|--------------|--------------------------|--------------|--------------|
|                                               | <i>Bam</i> HI             | <i>Sma</i> I | <i>Pst</i> I | <i>Bam</i> HI            | <i>Sma</i> I | <i>Pst</i> I |
| <b><i>Log phase 28°C</i></b>                  |                           |              |              |                          |              |              |
| WT                                            | 94.0                      | 78.5         | 98.5         | 6578                     | 177          | 6894         |
| $\Delta$ <i>recA</i>                          | 91.5                      | 83.3         | 98.6         | 199                      | 6            | 138          |
| $\Delta$ <i>ku1</i>                           | 86.4                      | 83.3         | 98.8         | 1481                     | 24           | 1212         |
| $\Delta$ <i>ku2</i>                           | 100.0                     | NA           | 100.0        | 26                       | 0            | 415          |
| $\Delta$ <i>ku34</i>                          | 88.7                      | 72.4         | 97.2         | 2308                     | 29           | 1153         |
| $\Delta$ <i>ku1234</i>                        | 100.0                     | NA           | 100.0        | 20                       | 0            | 380          |
| $\Delta$ <i>ku1234</i> $\Delta$ <i>recA</i>   | 100.0                     | NA           | 100.0        | 93                       | 0            | 170          |
| $\Delta$ <i>ligD2</i>                         | 100.0                     | NA           | 100.0        | 22                       | 0            | 640          |
| $\Delta$ <i>ligD134</i>                       | 92.0                      | 88.2         | 98.4         | 1391                     | 17           | 610          |
| $\Delta$ <i>ligD1234</i>                      | 100.0                     | NA           | 100.0        | 20                       | 0            | 524          |
| <b><i>Stationary phase</i></b>                |                           |              |              |                          |              |              |
| WT                                            | 89.2                      | 73.0         | 98.5         | 21341                    | 1562         | 20063        |
| $\Delta$ <i>ku1</i>                           | 82.1                      | 71.1         | 99.2         | 8244                     | 646          | 11728        |
| $\Delta$ <i>ku2</i>                           | 95.1                      | 67.8         | 97.0         | 1051                     | 270          | 908          |
| $\Delta$ <i>ku34</i>                          | 83.2                      | 58.8         | 89.3         | 7171                     | 719          | 2430         |
| $\Delta$ <i>ku234</i>                         | 100.0                     | NA           | 98.8         | 55                       | 0            | 2550         |
| $\Delta$ <i>ku1234</i>                        | 100.0                     | NA           | 100.0        | 58                       | 0            | 727          |
| <b><i>Log phase 40°C</i></b>                  |                           |              |              |                          |              |              |
| WT                                            | 92.4                      | 79.5         | 99.0         | 36035                    | 2475         | 55006        |
| $\Delta$ <i>ku1</i>                           | 71.8                      | 72.4         | 94.9         | 2050                     | 4176         | 3702         |
| $\Delta$ <i>ku2</i>                           | 66.2                      | 67.7         | 90.4         | 130                      | 155          | 539          |
| $\Delta$ <i>ku12</i>                          | 87.1                      | 69.3         | 83.7         | 3035                     | 940          | 2881         |
| $\Delta$ <i>ku34</i>                          | 95.5                      | 79.2         | 98.1         | 32078                    | 1606         | 40628        |
| $\Delta$ <i>ku1234</i>                        | 100.0                     | NA           | 99.5         | 8                        | 0            | 367          |
| $\Delta$ <i>ligD1234</i>                      | 100.0                     | NA           | 100.0        | 124                      | 0            | 2050         |
| $\Delta$ <i>ku12</i> $\Delta$ <i>ligD2</i>    | 74.5                      | 63.4         | 80.4         | 987                      | 1033         | 1400         |
| $\Delta$ <i>ku12</i> $\Delta$ <i>ligD4</i>    | 98.2                      | 36.8         | 98.4         | 739                      | 19           | 624          |
| $\Delta$ <i>ku12</i> $\Delta$ <i>ligD24</i>   | 100.0                     | 0.0          | 99.9         | 19                       | 56           | 950          |
| $\Delta$ <i>ku12</i> $\Delta$ <i>ligD234</i>  | 100.0                     | NA           | 100.0        | 10                       | 0            | 165          |
| $\Delta$ <i>ku12</i> $\Delta$ <i>ligD1234</i> | 100.0                     | NA           | 100.0        | 14                       | 0            | 396          |

<sup>a</sup>Fidelity was calculated as the ratio of blue (Lac<sup>+</sup>) vs total colony numbers

**Table S6:** Fidelity of repair events: two-sided Fisher tests

| Condition & Genotype                 | <i>Bam</i> HI               |                              | P value | <i>Pst</i> I                |                              | P value |
|--------------------------------------|-----------------------------|------------------------------|---------|-----------------------------|------------------------------|---------|
|                                      | Blue<br>(Lac <sup>+</sup> ) | White<br>(Lac <sup>-</sup> ) |         | Blue<br>(Lac <sup>+</sup> ) | White<br>(Lac <sup>-</sup> ) |         |
| <i>Log phase 28°C</i>                |                             |                              |         |                             |                              |         |
| WT                                   | 6185                        | 393                          | 0.0098  | 6788                        | 106                          | <0.0001 |
| <i>Δku2+ΔligD2+Δku1234+ΔligD1234</i> | 88                          | 0                            |         | 1959                        | 0                            |         |
| <i>Stationary phase</i>              |                             |                              |         |                             |                              |         |
| WT                                   | 19026                       | 2315                         | 0.0023  | 19769                       | 294                          | <0.0001 |
| <i>Δku1234</i>                       | 58                          | 0                            |         | 727                         | 0                            |         |
| <i>Δku2</i>                          |                             |                              |         | 881                         | 27                           | 0.0014  |
| <i>Δku234</i>                        |                             |                              |         | 2518                        | 32                           |         |
| <i>Δku2</i>                          |                             |                              |         | 881                         | 27                           | <0.0001 |
| <i>Δku1234</i>                       |                             |                              |         | 727                         | 0                            |         |
| <i>Log phase 40°C</i>                |                             |                              |         |                             |                              |         |
| WT                                   | 33305                       | 2730                         | <0.0001 | 54440                       | 566                          | <0.0001 |
| <i>Δku1234+ΔligD1234</i>             | 132                         | 0                            |         | 2414                        | 3                            |         |
| <i>Δku2</i>                          |                             |                              |         | 487                         | 52                           | <0.0001 |
| <i>Δku1234</i>                       |                             |                              |         | 365                         | 3                            |         |
| <i>Δku12</i>                         |                             |                              |         | 2411                        | 470                          | <0.0001 |
| <i>Δku1234</i>                       |                             |                              |         | 365                         | 2                            |         |
| <i>Δku12 ΔligD2</i>                  |                             |                              |         | 1125                        | 275                          | <0.0001 |
| <i>Δku12 ΔligD24+Δku12 ΔligD234+</i> |                             |                              |         | 1510                        | 1                            |         |
| <i>Δku12 ΔligD1234</i>               |                             |                              |         |                             |                              |         |
| <i>Δku12 ΔligD4</i>                  |                             |                              |         | 614                         | 10                           | <0.0001 |
| <i>Δku12 ΔligD24+Δku12 ΔligD234+</i> |                             |                              |         | 1510                        | 1                            |         |
| <i>Δku12 ΔligD1234</i>               |                             |                              |         |                             |                              |         |

## SUPPLEMENTARY FIGURES

**A**

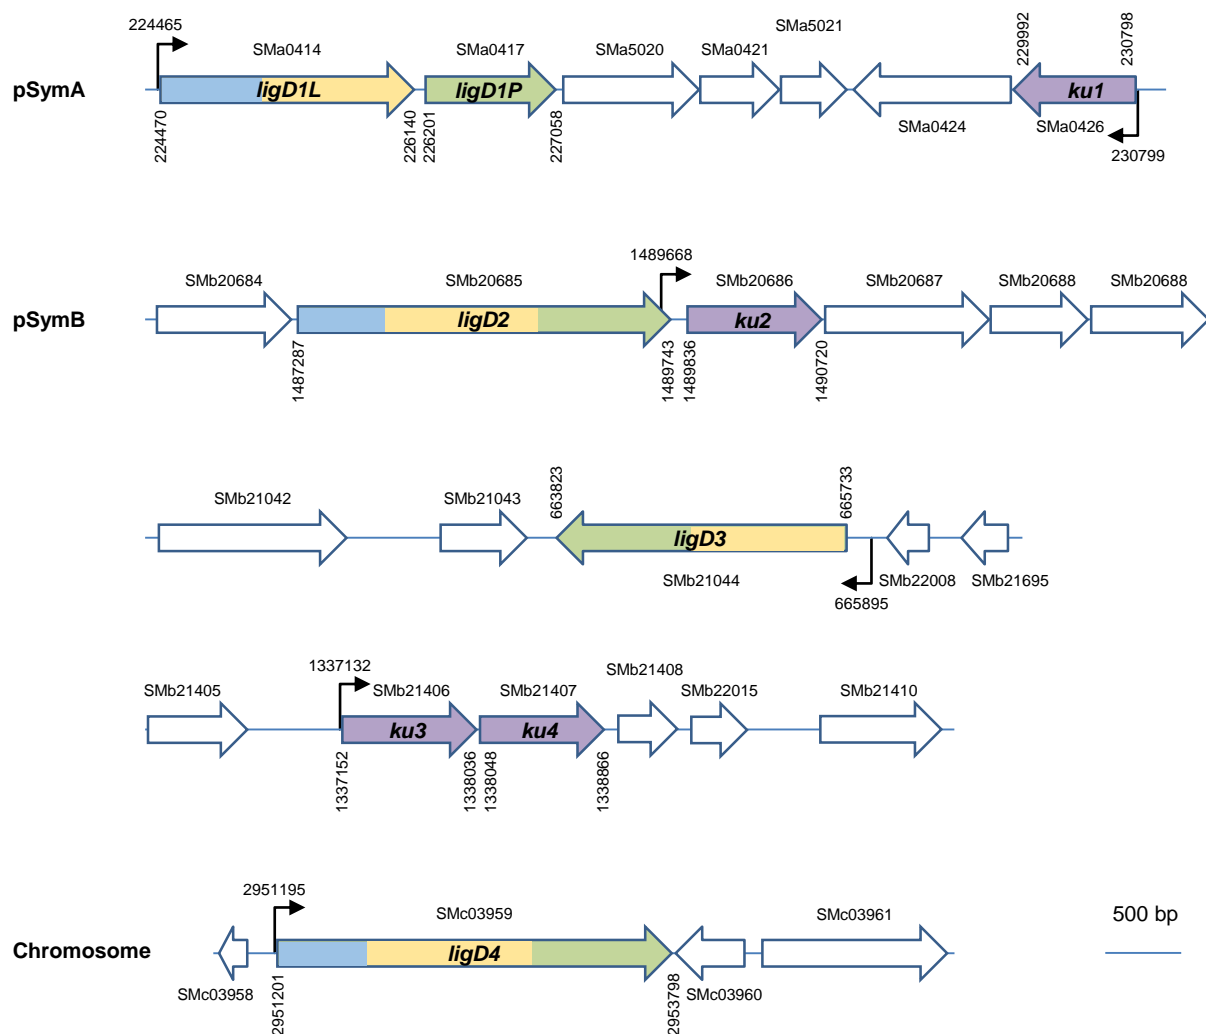

**B**

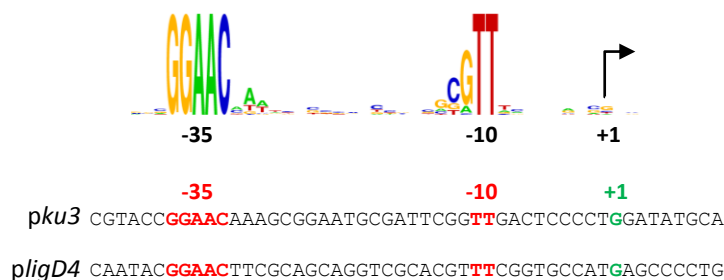

**Figure S1.** Genomic context of *ku* and *ligD* genes in *Sinorhizobium meliloti* (**A**) Organization of the *ku* and *ligD* genes on the *S. meliloti* replicons (the chromosome and the two megaplasmids pSymA and pSymB). The arrows represent ORFs and their directions of transcription. Coordinates of each *ligD* and *ku* ORF are noted according to *S. meliloti* GMI11495 strain annotation (<https://iant.toulouse.inra.fr/S.meliloti2011>). When available, transcription start site is indicated for *ku* and *ligD* genes (black arrow with coordinate). Predicted nuclease (blue), ligase (yellow) and polymerase (green) domains of LigD proteins are indicated on the corresponding genes. Adapted from (11), with modifications. (**B**) Putative RpoE2 binding motifs in *ku3* and *ligD4* promoters. Top: consensus sequence of promoter motifs recognized by RpoE2 (adapted from previous work, 12); bottom: promoter sequences of *ku3* and *ligD4* genes.

| <i>Bam</i> HI                      | GCGGCCGCTCTAGAACTAGTGGATCC <sup>▼</sup> CCCCGGGCTGCAGGAATTCGATAT<br>CGCCGGCGAGATCTTGATCACCTAGGGGGCCGACGTCTTAAGCTATA | number |
|------------------------------------|---------------------------------------------------------------------------------------------------------------------|--------|
| WT<br>Log phase<br>(28°C)          | GCGGCCGCTCTAGAACTAGTGGATCC <sup>▼</sup> CCCCGGGCTGCAGGAATTCGATAT                                                    | 26     |
|                                    | GCGGCCGCTCTAGAACTAGTGGATCC <sup>▼</sup> CCCCGGGCTGCAGGAATTCGATAT                                                    | 1      |
|                                    | large deletion                                                                                                      | 3      |
|                                    | total                                                                                                               | 30     |
| WT<br>Stationary phase<br>(28°C)   | GCGGCCGCTCTAGAACTAGTGGATCC <sup>▼</sup> CCCCGGGCTGCAGGAATTCGATAT                                                    | 28     |
|                                    | GCGGCCGCTCTAGAACTAGTGGATCC <sup>▼</sup> CCCCGGGCTGCAGGAATTCGATAT                                                    | 3      |
|                                    | GCGGCCGCTCTAGAACTAGTGGATCC <sup>▼</sup> CCCCGGGCTGCAGGAATTCGATAT                                                    | 1      |
|                                    | large deletion                                                                                                      | 1      |
|                                    | total                                                                                                               | 33     |
| WT<br>Log phase<br>(40°C)          | GCGGCCGCTCTAGAACTAGTGGATCC <sup>▼</sup> CCCCGGGCTGCAGGAATTCGATAT                                                    | 4      |
|                                    | GCGGCCGCTCTAGAACTAGTGGATCC <sup>▼</sup> CCCCGGGCTGCAGGAATTCGATAT                                                    | 1      |
|                                    | GCGGCCGCTCTAGAACTAGTGGATCC <sup>▼</sup> CCCCGGGCTGCAGGAATTCGATAT                                                    | 1      |
|                                    | large deletion                                                                                                      | 1      |
|                                    | total                                                                                                               | 7      |
| <i>ku12</i><br>Log phase<br>(40°C) | GCGGCCGCTCTAGAACTAGTGGATCC <sup>▼</sup> CCCCGGGCTGCAGGAATTCGATAT                                                    | 8      |
|                                    | GCGGCCGCTCTAGAACTAGTGGATCC <sup>▼</sup> CCCCGGGCTGCAGGAATTCGATAT                                                    | 1      |
|                                    | GCGGCCGCTCTAGAACTAGTGGATCC <sup>▼</sup> CCCCGGGCTGCAGGAATTCGATAT                                                    | 1      |
|                                    | GCGGCCGCTCTAGAACTAGTGGATCC <sup>▼</sup> CCCCGGGCTGCAGGAATTCGATAT                                                    | 1      |
|                                    | AGTCCACC Δ27 GATCC <sup>▼</sup> CCCCGGGCTGCAGGAATTCGATAT                                                            | 1      |
|                                    | GCGGCCGCTCTAGAACTAGTGGAT Δ35 CGATACCGTCGACCT                                                                        | 1      |
|                                    | large deletion                                                                                                      | 3      |
|                                    | total                                                                                                               | 16     |
| <i>Sma</i> I                       | GCGGCCGCTCTAGAACTAGTGGATCC <sup>▼</sup> CCCCGGGCTGCAGGAATTCGATAT<br>CGCCGGCGAGATCTTGATCACCTAGGGGGCCGACGTCTTAAGCTATA | number |
| WT<br>Log phase<br>(28°C)          | GCGGCCGCTCTAGAACTAGTGGATCC <sup>▼</sup> CCCCGGGCTGCAGGAATTCGATAT                                                    | 8      |
|                                    | GCGGCCGCTCTAGAACTAGTGGATCC <sup>▼</sup> CCCCGGGCTGCAGGAATTCGATAT                                                    | 3      |
|                                    | large deletion                                                                                                      | 1      |
|                                    | total                                                                                                               | 12     |
| WT<br>Stationary phase<br>(28°C)   | GCGGCCGCTCTAGAACTAGTGGATCC <sup>▼</sup> CCCCGGGCTGCAGGAATTCGATAT                                                    | 20     |
|                                    | GCGGCCGCTCTAGAACTAGTGGATCC <sup>▼</sup> CCCCGGGCTGCAGGAATTCGATAT                                                    | 7      |
|                                    | large deletion                                                                                                      | 2      |
|                                    | total                                                                                                               | 29     |
| WT<br>Log phase<br>(40°C)          | GCGGCCGCTCTAGAACTAGTGGATCC <sup>▼</sup> CCCCGGGCTGCAGGAATTCGATAT                                                    | 2      |
|                                    | GCGGCCGCTCTAGAACTAGTGGATCC <sup>▼</sup> CCCC Δ32 TACCGT                                                             | 1      |
|                                    | GATTAAG Δ92 GGGCTGCAGGAATTCGATAT                                                                                    | 1      |
|                                    | large deletion                                                                                                      | 3      |
|                                    | total                                                                                                               | 7      |
| <i>ku12</i><br>Log phase<br>(40°C) | GCGGCCGCTCTAGAACTAGTGGATCC <sup>▼</sup> CCCCGGGCTGCAGGAATTCGATAT                                                    | 4      |
|                                    | GCGGCCGCTCTAGAACTAGTGGATCC <sup>▼</sup> CCCCGGGCTGCAGGAATTCGATAT                                                    | 1      |
|                                    | GCGGCCGCTCTAGAACTAGTGGATCC <sup>▼</sup> CCCCGGGCTGCAGGAATTCGATAT                                                    | 1      |
|                                    | CCCAG Δ113 GCCCGGT                                                                                                  | 1      |
|                                    | CCCAGTACGA Δ91 TACCGTCG                                                                                             | 1      |
|                                    | large deletion                                                                                                      | 2      |
|                                    | total                                                                                                               | 10     |

| <i>Pst</i> I                       | GCGGCCGCTCTAGAACTAGTGGATCC <sup>▼</sup> CCCCGGGCTGCAGGAATTCGATAT<br>CGCCGGCGAGATCTTGATCACCTAGGGGGCCGACGTCTTAAGCTATA | number |
|------------------------------------|---------------------------------------------------------------------------------------------------------------------|--------|
| WT<br>Log phase<br>(28°C)          | GCGGCCGCTCTAGAACTAGTGGATCC <sup>▼</sup> CCCCGGGCTGCAGGAATTCGATAT                                                    | 3      |
|                                    | GCGGCCGCTCTAGAACTAGTGGATCC <sup>▼</sup> CCCCGGGCTGCAGGAATTCGATAT                                                    | 1      |
|                                    | large deletion                                                                                                      | 3      |
|                                    | total                                                                                                               | 7      |
| WT<br>Stationary phase<br>(28°C)   | GCGGCCGCTCTAGAACTAGTGGATCC <sup>▼</sup> CCCCGGGCTGCAGGAATTCGATAT                                                    | 2      |
|                                    | GCGGCCGCTCTAGAACTAGTGGATCC <sup>▼</sup> CCCCGGGCTGCAGGAATTCGATAT                                                    | 3      |
|                                    | GCGGCCGCTCTAGAACTAGTGGATCC <sup>▼</sup> CCCCGGGCTGCAGGAATTCGATAT                                                    | 1      |
|                                    | GCGGCCGCTCTAGAACTAGTGGATCC <sup>▼</sup> CCCCGGGCTGCAGGAATTCGATAT                                                    | 1      |
|                                    | GCGGCCGCTCTAGAACTAGTGGATCC <sup>▼</sup> CCCCGGGCTGCAGGAATTCGATAT                                                    | 1      |
|                                    | GGGGTTTTΔ78 GAACTAGTGGATCC <sup>▼</sup> CCCCGGGCTGCAGGAATTCGATAT                                                    | 1      |
|                                    | large deletion                                                                                                      | 8      |
|                                    | total                                                                                                               | 17     |
| WT<br>Log phase<br>(40°C)          | GCGGCCGCTCTAGAACTAGTGGATCC <sup>▼</sup> CCCCGGGCTGCAGGAATTCGATAT                                                    | 2      |
|                                    | GCGGCCGCTCTAGAACTAGTGGATCC <sup>▼</sup> CCCCGGGCTGCAGGAATTCGATAT                                                    | 1      |
|                                    | GCGGCCGCTCTAGAACTAGTGGATCC <sup>▼</sup> CCCCGGGCTGCAGGAATTCGATAT                                                    | 1      |
|                                    | GCGGCCGCTCTAGAACTAGTGGATCC <sup>▼</sup> CCCCGGGCTG Δ34 CCTCGAAAAA                                                   | 1      |
|                                    | large deletion                                                                                                      | 2      |
|                                    | total                                                                                                               | 7      |
| <i>ku12</i><br>Log phase<br>(40°C) | GCGGCCGCTCTAGAACTAGTGGATCC <sup>▼</sup> CCCCGGGCTGCAGGAATTCGATAT                                                    | 5      |
|                                    | GCGGCCGCTCTAGAACTAGTGGATCC <sup>▼</sup> CCCCGGGCTGCAGGAATTCGATAT                                                    | 2      |
|                                    | GCGGCCGCTCTAGAACTAGTGGATCC <sup>▼</sup> CCCCGGGCTGCAGGAATTCGATAT                                                    | 1      |
|                                    | GCGGCCGCTCTAGAACTAGTGGATCC <sup>▼</sup> CCCCGGGCTGCAGGAATTCGATATCAA                                                 | 1      |
|                                    | GCGGCCGCTCTAGAACTAGTGGATCC <sup>▼</sup> CCCCGGGCTGCAGGAATTCGATAT                                                    | 1      |
|                                    | total                                                                                                               | 10     |

**Figure S2.** Infidelity of NHEJ during linear plasmid repair in *Sinorhizobium meliloti*. Linear plasmid DNA generated by restriction digest with either *Bam*HI (5' overhang), *Sma*I (blunt) or *Pst*I (3' overhang) was used to transform WT (CBT707) and  $\Delta ku12$  (CBT1892) competent cells prepared from exponential phase cultures at 28°C (blue) or after heat stress at 40°C (red) or from stationary phase cultures (green). This figure shows the DNA sequence of junctions in Lac<sup>-</sup> colonies resulting from unfaithful repair events. Parental sequences are indicated as double-stranded DNA, whereas only the upper strand is shown for the sequenced DNA junctions. The restriction sites are in dark blue (with black triangles indicating the cut sites), the nucleotide additions in red, and the deletions in bold green. Large deletions are noted as numbers of deleted nucleotides (when known), or as large deletions when estimated to be > 100 nt by agarose gel electrophoresis of the plasmids. The number of events found is indicated in the right column. Note that insertions or deletions of 3 nucleotides were never found, presumably because they led to Lac<sup>+</sup> colonies. Sequencing of plasmid DNA from 51 randomly chosen blue (Lac<sup>+</sup>) colonies obtained upon transformation of various strains with linear plasmids carrying all types of DNA ends revealed the WT sequence in every case, showing that the level of false positives resulting from addition or deletion of nucleotide triplet(s) is less than 2%.

| <i>I-SceI</i>                       |                                                                                                                                               | number |
|-------------------------------------|-----------------------------------------------------------------------------------------------------------------------------------------------|--------|
|                                     | AGAATACGTGGGGATCC <b>TAGGGATA</b> ▲ <b>CAGGGTAAT</b> GGATCGCCGAAATGA<br>TCTTATGCACCCCTAGG <b>ATCCCTATTGTCC</b> ▲ <b>CATTACCT</b> AGCGGCTTTACT |        |
| WT<br>Log phase<br>(28°C)           | AGAATACGTGGGGATCC <b>TAGGGATA</b> ▲ <b>CAGGGTAAT</b> GGATCGCCGAAATGA                                                                          | 1      |
|                                     | AGAATACGTGGGGATCC <b>TAGGGATA</b> ▲ <b>CAGGGTAAT</b> GGATCGCCGAAATGA                                                                          | 3      |
|                                     | AGAATACGTGGGGATCC <b>TAGGGATA</b> ▲ <b>CAGGGTAAT</b> GGATCGCCGAAATGA                                                                          | 1      |
|                                     | AGAATACGTGGGGATCC <b>TAGGGATA</b> ▲ <b>CAGGGTAAT</b> GGATCGCCGAAATGA                                                                          | 2      |
|                                     | AGAATACGTGGGGATCC <b>TAGGGATA</b> ▲ <b>Δ251</b> ATGGCCGGACACGTGAAG                                                                            | 1      |
|                                     | GCGCTCGTCCCGGCACTGAA <b>Δ214</b> <b>CAGGGTAAT</b> GGATCGCCGAAATGA                                                                             | 1      |
|                                     | total                                                                                                                                         | 9      |
| WT<br>Log phase<br>(40°C)           | AGAATACGTGGGGATCC <b>TAGGGATA</b> ▲ <b>CAGGGTAAT</b> GGATCGCCGAAATGA                                                                          | 1      |
|                                     | AGAATACGTGGGGATCC <b>TAGGGATA</b> ▲ <b>CAGGGTAAT</b> GGATCGCCGAAATGA                                                                          | 3      |
|                                     | AGAATACGTGGGGATCC <b>TAGGGATA</b> ▲ <b>CAGGGTAAT</b> GGATCGCCGAAATGA                                                                          | 3      |
|                                     | AGAATACGTGGGGATCC <b>TAGGGATA</b> ▲ <b>CAGGGTAAT</b> GGATCGCCGAAATGA                                                                          | 1      |
|                                     | AGAATACGTGGGGATCC <b>TAGGGATA</b> ▲ <b>Δ343</b> CCTCATCAACGGTGCCGAA                                                                           | 1      |
|                                     | total                                                                                                                                         | 9      |
| $\Delta ku2$<br>Log phase<br>(40°C) | AGAATACGTGGGGATCC <b>TAGGGATA</b> ▲ <b>CAGGGTAAT</b> GGATCGCCGAAATGA                                                                          | 2      |
|                                     | AGAATACGTGGGGATCC <b>TAGGGATA</b> ▲ <b>CAGGGTAAT</b> GGATCGCCGAAATGA                                                                          | 4      |
|                                     | AGAATACGTGGGGATCC <b>TAGGGATA</b> ▲ <b>CAGGGTAAT</b> GGATCGCCGAAATGA                                                                          | 11     |
|                                     | AGAATACGTGGGGATCC <b>TAGGGATA</b> ▲ <b>CAGGGTAAT</b> GGATCGCCGAAATGA                                                                          | 2      |
|                                     | AGAATACGTGGGGATCC <b>TAGGGATA</b> ▲ <b>CAGGGTAAT</b> GGATCGCCGAAATGA                                                                          | 3      |
|                                     | total                                                                                                                                         | 22     |

**Figure S3.** Infidelity of NHEJ during repair of chromosomal double-strand breaks. Competent cells of the *S. meliloti* strains CBT2173 (WT) and CBT2175 ( $\Delta ku2$ ) carrying a *I-SceI* site in the chromosome were prepared either at 28°C (blue) or 40°C (red) and were transformed with the *I-SceI*-expressing plasmid pLS273-25. This figure shows the DNA sequence of junctions in transformants carrying a *I-SceI* site resistant to restriction digest, which all result from unfaithful repair events. The parental sequence is shown as double-stranded DNA, whereas only the upper strand is shown for the sequenced DNA junctions. The *I-SceI* restriction site is in dark blue (with black triangles indicating the cut sites), the nucleotide insertions in red, and the deletions in bold green. Large deletions are noted as numbers of deleted nucleotides. The number of events found is indicated in the right column.

| Strain and condition                  | plasmid sequence                                     | mutation                  | plasmid position of mutation (nt) | <i>I-SceI</i> CDS position of mutation (nt) | mutation effect                                             |
|---------------------------------------|------------------------------------------------------|---------------------------|-----------------------------------|---------------------------------------------|-------------------------------------------------------------|
| WT<br>Log phase (28°C)                | TGAACACC <b>A</b> AGTCTTTCAC                         | C> <b>A</b>               | 3057                              | 487                                         | CAG (Q163) > <b>AAG (K)</b>                                 |
|                                       | CCTGATCCCG <b>T</b> AGATGATGTAC                      | C> <b>T</b>               | 3219                              | 649                                         | CAG (Q217) > <b>TAG (STOP)</b>                              |
|                                       | CAACAAAAACAAC <b>A</b> GATCATCTACAT                  | C> <b>A</b>               | 3151                              | 581                                         | CCG (P194) > <b>CAG (Q)</b>                                 |
| $\Delta ku2$<br>Log phase (28°C)      | GGGTCCGA <b>A</b> CTCTAAACTGCTGAAAGAATACAA <b>IS</b> | ISRm1 (~1.3 kb) insertion | 2632                              | 62                                          | Protein interrupted by <b>IS</b> after Y20                  |
|                                       | CAGGTATCCGGTCTGATCCCTGGG <b>IS</b>                   | ISRm1 (~1.3 kb) insertion | 2692                              | 122                                         | Protein interrupted by <b>IS</b> after L40                  |
|                                       | CCCAGACTTT-AAACACCAA                                 | Deletion : <b>C</b>       | 2875                              | 305                                         | Frameshift after T101                                       |
|                                       | GAAGCAGGTATCG <b>C</b> CTGTGATCCCTGGG                | <b>G&gt;C</b>             | 2680                              | 110                                         | GGT (G37) > <b>GCT (A)</b>                                  |
| $\Delta ku1234$<br>Log phase (28°C)   | GGTCTGATCCCTGG <b>A</b> TGATGCTTACATCC               | <b>G&gt;T</b>             | 2692                              | 122                                         | GGT (Q41) > <b>GAT (D)</b>                                  |
|                                       | TACATGGACCACGTATGTCTG <b>IS</b>                      | ISRm1 (~1.3 kb) insertion | 2783                              | 213                                         | Protein interrupted by <b>IS</b> after L71                  |
|                                       | AAAAACAAACCGATCATCT <b>IS</b>                        | ISRm1 (~1.3 kb) insertion | 3160                              | 590                                         | Protein interrupted by <b>IS</b> after I196                 |
|                                       | ACATCCGTCTCTGTGAT <b>IS</b>                          | ISRm1 (~1.3 kb) insertion | 2719                              | 149                                         | Protein interrupted by <b>IS</b> after D49                  |
| $\Delta ligD1234$<br>Log phase (28°C) | GATGCTTACAT <b>C</b> ACGTTCTCGTGA                    | Insertion : <b>A</b>      | 2706                              | 136                                         | Frameshift after I45                                        |
|                                       | AACTGAACATCGAACAGT <b>IS</b>                         | ISRm1 (~1.3 kb) insertion | 2664                              | 94                                          | Protein interrupted by <b>IS</b> after Q31                  |
| WT<br>Log phase (40°C)                | TTCTATGTCTT <b>A</b> ACTGATCTTCTAC                   | C> <b>A</b>               | 3179                              | 609                                         | TAC (Y203) > <b>TAA (STOP)</b>                              |
|                                       | GCAGGTATCGGTCTG <b>\Delta 80 bp</b> CATGGACCACGTATG  | Deletion : <b>80 bp</b>   | 2685                              | 115                                         | Loss of 26 a.a. and frameshift after L38                    |
|                                       | GGTGGTAAA <b>\Delta 17 bp</b> CTCTACCAAC             | Deletion : <b>17 bp</b>   | 3009                              | 439                                         | Loss of 5 a.a. and frameshift after K146                    |
| $\Delta ku2$<br>Log phase (40°C)      | AACTGAACATCGAA <b>T</b> AGTTCGAAGCAGG                | C> <b>T</b>               | 2661                              | 91                                          | CAG (Q31) > <b>TAG (STOP)</b>                               |
|                                       | GACTTTCAAACAC <b>\Delta 994 bp</b> TTCTCCAACGAGCCT   | Deletion : <b>994 bp</b>  | 2883                              | 313                                         | Loss of last 129 a.a. after H104                            |
|                                       | GAAGAAGTA <b>T</b> AATACCTGG                         | <b>G&gt;T</b>             | 3081                              | 511                                         | GAA (E170) > <b>TAA (STOP)</b>                              |
|                                       | ACTGCGCCGGTTAA <b>\Delta 124 bp</b> GCTGATCGAACTGAA  | Deletion : <b>124 bp</b>  | 2514                              | -56                                         | 124 bp deleted just downstream the transcription start site |
|                                       | GGGGCGCCAG <b>A</b> ATTTCAAACACCAAG                  | C> <b>A</b>               | 2872                              | 302                                         | ACT (T101) > <b>AAT (N)</b>                                 |
|                                       | TACGATCAG <b>C</b> GGGTACTGT                         | T> <b>C</b>               | 2796                              | 226                                         | TGG (W76) > <b>CGG (R)</b>                                  |
| $\Delta ku1234$<br>Log phase (40°C)   | AAATGGGAT <b>T</b> GAACAAAA                          | C> <b>G</b>               | 3017                              | 447                                         | TAC (Y149) > <b>TAG (STOP)</b>                              |
|                                       | GTACGATCAGT <b>G</b> TGTACTGTCCCC                    | <b>G&gt;T</b>             | 2798                              | 228                                         | TGG (W76) > <b>TGT (C)</b>                                  |
|                                       | GATGCTTACAT <b>C</b> ACGTTCTCGTGA                    | Insertion : <b>A</b>      | 2706                              | 136                                         | Frameshift after I45                                        |
| $\Delta ligD1234$<br>Log phase (40°C) | TTCCA <b>A</b> CTGA <b>A</b> CTTTTACGTAAAAAT         | <b>G&gt;T</b>             | 3124                              | 554                                         | TGT (C185) > <b>TTT (F)</b>                                 |
|                                       | AAAAACAAACCGATCATCTAC <b>IS</b>                      | ISRm1 (~1.3 kb) insertion | 3162                              | 592                                         | Protein interrupted by <b>IS</b> after Y197                 |
|                                       | ACTGAACAC <b>C</b> GAGTCTTCACTTT                     | C> <b>G</b>               | 3057                              | 487                                         | CAG (Q163) > <b>GAG (E)</b>                                 |
|                                       | AAAACCTACT <b>A</b> TATGCAGTTC                       | <b>G&gt;A</b>             | 2734                              | 164                                         | TGT (C55) > <b>TAT (Y)</b>                                  |

**Figure S4.** Sequence analysis of *I-SceI*-expressing plasmids extracted from clones showing an intact *I-SceI* restriction site. Competent cells of the *S. meliloti* strains CBT2173 (WT), CBT2175 ( $\Delta ku2$ ), CBT2177 ( $\Delta ku1234$ ) and CBT2496 ( $\Delta ligD1234$ ) carrying a *I-SceI* restriction site in the chromosome were prepared either at 28°C (blue) or 40°C (red) and were transformed with the *I-SceI*-expressing plasmid pLS273-25. Plasmid DNA was extracted from 29 colonies carrying an intact *I-SceI* site originating from the different strains and conditions, and the sequence of the *I-SceI* meganuclease encoding gene of these plasmids was determined. The figure shows the mutations found in red.



| insertion in the expected orientation |                                             | <i>spec<sup>R</sup></i> insert |                                                | number |
|---------------------------------------|---------------------------------------------|--------------------------------|------------------------------------------------|--------|
|                                       | TGGGGATCCTAGGG <b>ATAA</b> TTGGAGCTT        | //                             | CCCAA <b>ATAA</b> CAGGGTAATGGATCGCCG           |        |
|                                       | ACCCCTAGGATCCC <b>TATTA</b> AACCTCGAA       | //                             | GGGTT <b>TATT</b> GTCCCATTACCTAGCGGC           |        |
| WT<br>(Log phase 28°C)                | TGGGGATCCTAGGG <b>ATAA</b> TTGGAGCTT        | //                             | CCCAA <b>ATAA</b> CAGGGTAATGGATCGCCG           | 2      |
|                                       | TGGGGATCCTAGGG <b>ATAA</b> TTGGAGCTT        | //                             | CCCAA <b>ATAA</b> CAGGGTAATGGATCGCCG           | 1      |
|                                       |                                             |                                | total:                                         | 3      |
| WT<br>(Log phase 40°C)                | TGGGGATCCTAGGG <b>ATAA</b> TTGGAGCTT        | //                             | CCCAA <b>ATAA</b> CAGGGTAATGGATCGCCG           | 14     |
|                                       | TGGGGATCCTAGGG <b>ATAA</b> TTGGAGCTT        | //                             | CCCAA <b>ATAA</b> CAGGGTAATGGATCGCCG           | 1      |
|                                       | TGGGGATCCTAGGG <b>ATAA</b> TTGGAGCTT        | //                             | CCCAA <b>ATAA</b> <b>Δ146</b> ATCAT            | 1      |
|                                       | TGGGGATCCTAGGG <b>ATAA</b> <b>Δ262</b> GCC  | //                             | CCCAA <b>ATAA</b> CAGGGTAATGGATCGCCG           | 1      |
|                                       |                                             |                                | total:                                         | 17     |
| $\Delta ku2$<br>(Log phase 40°C)      | TGGGGATCCTAGGG <b>ATAA</b> TTGGAGCTT        | //                             | CCCAA <b>ATAA</b> CAGGGTAATGGATCGCCG           | 2      |
|                                       | TGGGGATCCTAGGG <b>ATAA</b> TTGGAGCTT        | //                             | CCCAA <b>ATAA</b> CAGGGTAATGGATCGCCG           | 1      |
|                                       |                                             |                                | total:                                         | 3      |
| insertion in the opposite orientation |                                             | <i>spec<sup>R</sup></i> insert |                                                | number |
|                                       | TGGGGATCCTAGGG <b>ATAA</b> TTGGG            | //                             | TCCAA <b>TATAT</b> CAGGGTAATGGATCGCCG          |        |
|                                       | ACCCCTAGGATCCC <b>ATAA</b> AACCC            | //                             | AGGTT <b>TATT</b> GTCCCATTACCTAGCGGC           |        |
| WT<br>(Log phase 28°C)                | TGGGGATCCTAGGG <b>ATAA</b> <b>TAT</b> TTGGG | //                             | TCCAA <b>TATATATAA</b> CAGGGTAATGGATCGCCG      | 1      |
|                                       |                                             |                                | total:                                         | 1      |
| WT<br>(Log phase 40°C)                | TGGGGATCCTAGGG <b>ATAA</b> <b>TAT</b> TTGGG | //                             | TCCAA <b>TATATATAA</b> CAGGGTAATGGATCGCCG      | 1      |
|                                       | TGGGGATCCTAGGG <b>ATAA</b> <b>TAT</b> TTGGG | //                             | TCCAA <b>TATATATAA</b> CAGGGTAATGGATCGCCG      | 1      |
|                                       | TGGGGATCCTAGGG <b>ATAA</b> <b>TAT</b> TTGGG | //                             | TCCAA <b>TATATATAA</b> CAGGGTAATGGATCGCCG      | 1      |
|                                       | TGGGGATCCTAGGG <b>ATAA</b> <b>TAT</b> TTGGG | //                             | TCT <b>Δ252</b> <b>ATAA</b> CAGGGTAATGGATCGCCG | 1      |
|                                       |                                             |                                | total:                                         | 5      |

**Figure S5.** Sequence of junctions of insertion events at the *rhaS* locus carrying a *I-SceI* restriction site. Competent cells of the *S. meliloti* strains CBT2173 (WT) and CBT2175 ( $\Delta ku2$ ) carrying a *I-SceI* restriction site in the chromosome and the *I-SceI*-expressing plasmid pLS273-25\* under the control of a cumate inducible promoter were prepared either at 28°C (blue) or 40°C (red) in the presence of cumate. Cells were transformed with a linear DNA cassette carrying a Spec resistance gene flanked by *I-SceI*-compatible restriction sites generated with *Bst*XI (dark blue). This figure shows the DNA sequence of junctions in transformants having inserted the Spec resistance cassette at the chromosomal *I-SceI* site.

Insertions in the expected (upper part) or opposite (lower part) orientation are shown. Parental sequences are indicated as double-stranded DNA, whereas only the upper strand is shown for the sequenced DNA junctions. The 3' compatible protruding ends are shown in bold and the non-compatible 3' ends of inverted insertion events are in bold underlined.

Deleted nucleotides are indicated in green and large deletions are noted as numbers of deleted nucleotides. The number of events found is indicated in the right column.

## SUPPLEMENTARY REFERENCES

1. Ferri,L., Gori,A., Biondi,E.G., Mengoni,A. and Bazzicalupo,M. (2010) Plasmid electroporation of *Sinorhizobium* strains: The role of the restriction gene *hsdR* in type strain Rm1021. *Plasmid*, **63**, 128–135.
2. Pobigaylo,N., Wetter,D., Szymczak,S., Schiller,U., Kurtz,S., Meyer,F., Nattkemper,T.W. and Becker,A. (2006) Construction of a large signature-tagged mini-Tn5 transposon library and its application to mutagenesis of *Sinorhizobium meliloti*. *Appl. Environ. Microbiol.*, **72**, 4329–4337.
3. Sallet,E., Roux,B., Sauviac,L., Jardinaud,M.-F., Carrère,S., Faraut,T., de Carvalho-Niebel,F., Gouzy,J., Gamas,P., Capela,D., *et al.* (2013) Next-generation annotation of prokaryotic genomes with EuGene-P: application to *Sinorhizobium meliloti* 2011. *DNA Res. Int. J. Rapid Publ. Rep. Genes Genomes*, **20**, 339–354.
4. Dupuy,P., Gourion,B., Sauviac,L. and Bruand,C. (2017) DNA double-strand break repair is involved in desiccation resistance of *Sinorhizobium meliloti*, but is not essential for its symbiotic interaction with *Medicago truncatula*. *Microbiology*, **163**, 333–342.
5. Quandt,J. and Hynes,M.F. (1993) Versatile suicide vectors which allow direct selection for gene replacement in gram-negative bacteria. *Gene*, **127**, 15–21.
6. Kovach,M.E., Elzer,P.H., Hill,D.S., Robertson,G.T., Farris,M.A., Roop,R.M. and Peterson,K.M. (1995) Four new derivatives of the broad-host-range cloning vector pBBR1MCS, carrying different antibiotic-resistance cassettes. *Gene*, **166**, 175–176.
7. Prentki,P. and Krisch,H.M. (1984) *In vitro* insertional mutagenesis with a selectable DNA fragment. *Gene*, **29**, 303–313.
8. Déjean,G., Blanvillain-Baufumé,S., Boulanger,A., Darrasse,A., Dugé de Bernonville,T., Girard,A.-L., Carrère,S., Jamet,S., Zischek,C., Lautier,M., *et al.* (2013) The xylan utilization system of the plant pathogen *Xanthomonas campestris pv campestris* controls epiphytic life and reveals common features with oligotrophic bacteria and animal gut symbionts. *New Phytol.*, **198**, 899–915.
9. Flannagan,R.S., Linn,T. and Valvano,M.A. (2008) A system for the construction of targeted unmarked gene deletions in the genus *Burkholderia*. *Environ. Microbiol.*, **10**, 1652–1660.
10. Kaczmarczyk,A., Vorholt,J.A. and Francez-Charlot,A. (2013) Cumate-inducible gene expression system for sphingomonads and other *Alphaproteobacteria*. *Appl. Environ. Microbiol.*, **79**, 6795–6802.
11. Kobayashi,H., Simmons,L.A., Yuan,D.S., Broughton,W.J. and Walker,G.C. (2008) Multiple Ku orthologues mediate DNA non-homologous end-joining in the free-living form and during chronic infection of *Sinorhizobium meliloti*. *Mol. Microbiol.*, **67**, 350–363.

12. Sauviac,L., Philippe,H., Phok,K. and Bruand,C. (2007) An extracytoplasmic function sigma factor acts as a general stress response regulator in *Sinorhizobium meliloti*. *J. Bacteriol.*, **189**, 4204–4216.
